# Supplementary material
Source: Springer Nature journal article supplement (https://www.springermedizin.de/resource/supplementary/12935_2006_147_MOESM1_ESM.pdf/9541184)

# MEF - 10(1)

Percent Cell Cycle Phase

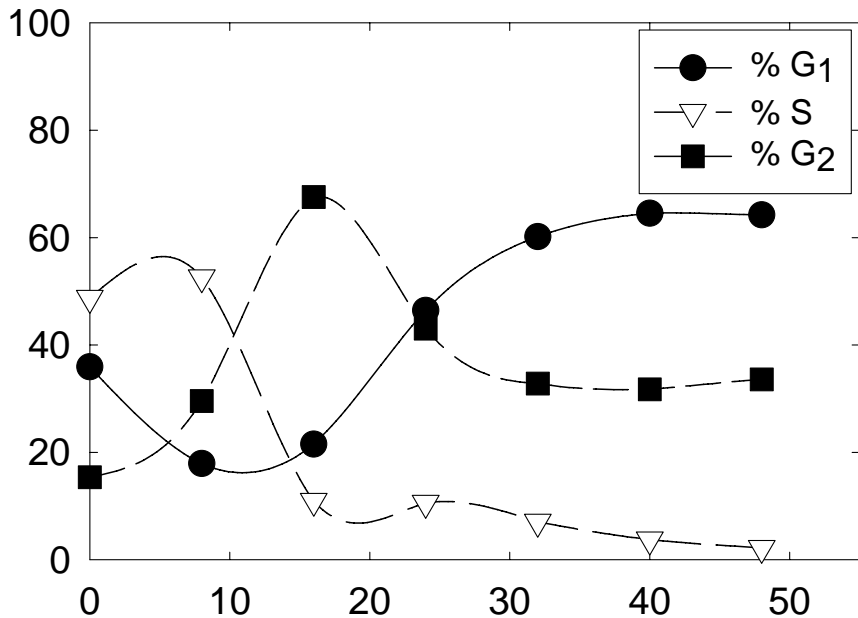

Hours After Irradiation

Supplement: MOESM1 [file 9541184]
